# Supplementary material for: Emulating endothelial dysfunction by implementing an early atherosclerotic microenvironment within a microfluidic chip
Source: Royal Society of Chemistry journal article supplement (doi:10.1039/c9lc00352e), 2019-01-01
Supplement: c9lc00352e1.pdf [file c9lc00352e1.pdf]

**Lab on a chip**  
**Supplementary information**

**Title:** Emulating endothelial dysfunction by implementing early atherosclerotic microenvironment within a microfluidic chip

**Authors:** Yujin Shin, Seongjin Lim, Jinwon Kim, Jessie S. Jeon, Hongki Yoo, and Bomi Gweon

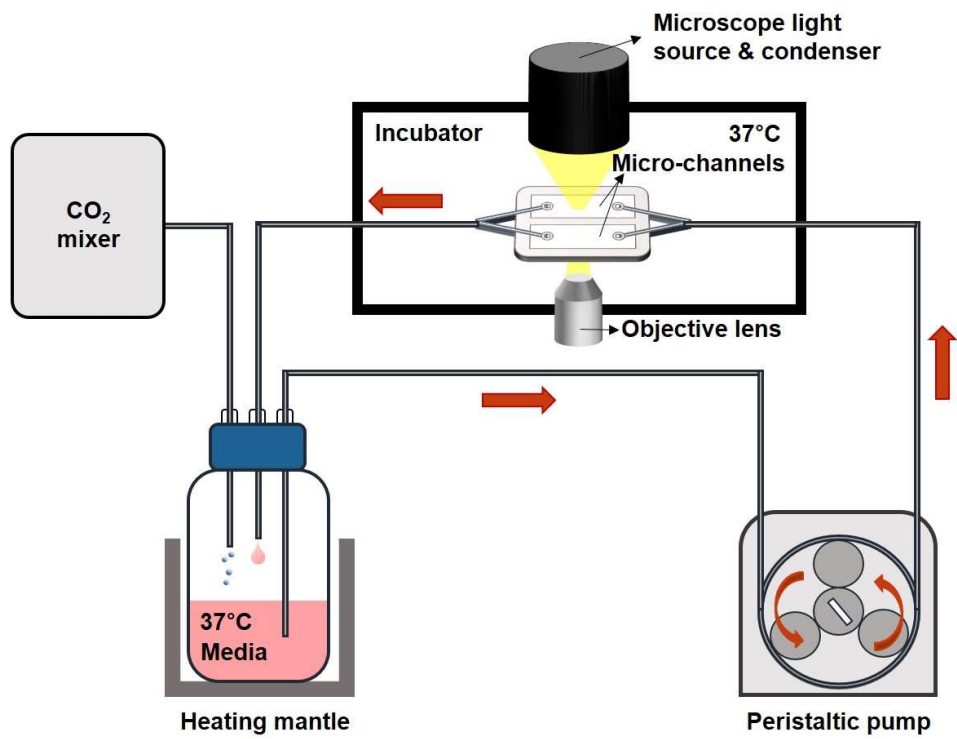

**Figure S1 Schematic of experimental setup for the flow and imaging system.**

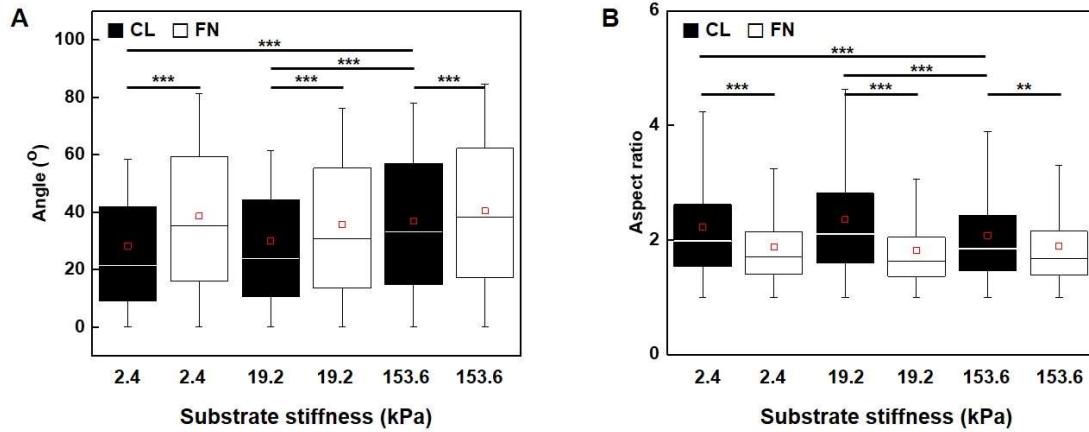

**Figure S2 (A) Cellular orientation angle relative to the fluid flow axis after the cells were exposed to shear stress for 25 hours. (\*\*\*)  $p \leq 0.0001$ ) (Box and whisker plot: range of the box = 25 ~ 75%, line in the box = median value, red square in the box = mean value, and whisker =  $\pm 0.5$  IQR) (B) Aspect ratio of cells within the monolayer after the cells were exposed to shear stress for 25 hours. (\*\*\*)  $p \leq 0.0001$ , \*\*  $p \leq 0.001$ ) (Box and whisker plot: range of the box = 25 ~ 75%, line in the box = median value, red square in the box = mean value, and whiskers =  $\pm 1.5$  IQR). Number of cells for all experimental conditions are  $\sim 20,000$ .**

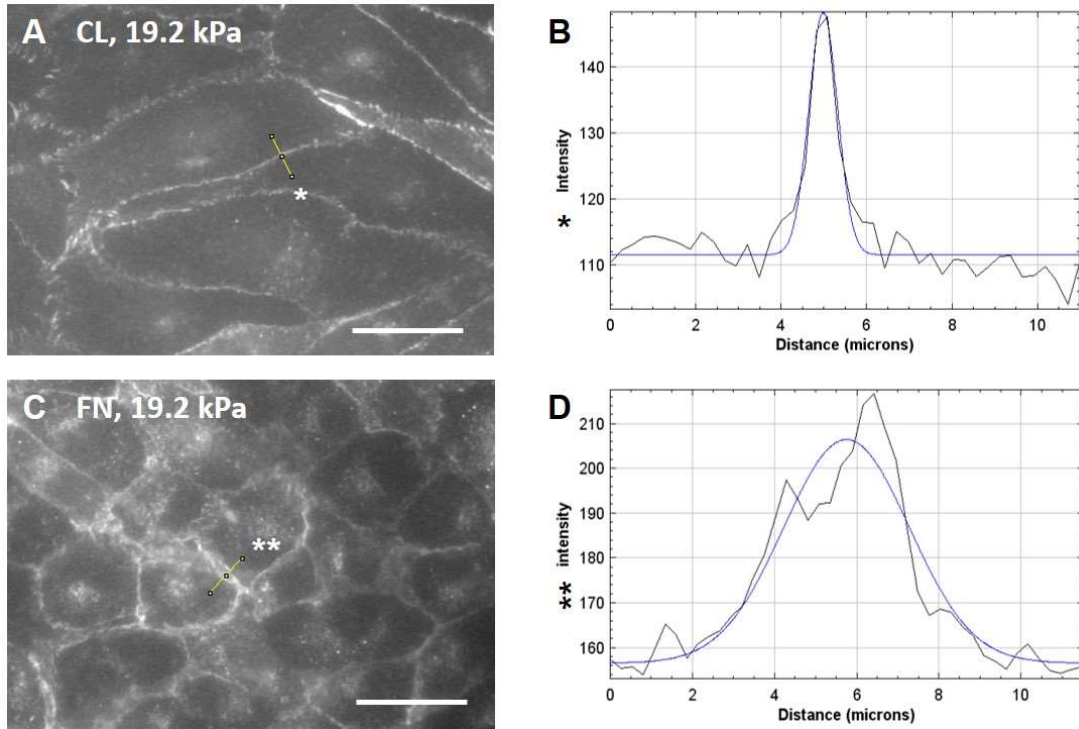

**Figure S3 Measuring VE-cadherin width in collagen, 19.2 kPa VE-cadherin image: (A) A representative image showing how to select a perpendicular line across the VE-cadherin signal. (yellow line), (B) black line: the intensity profile across the yellow line in A, blue line: Gaussian fitting. Measuring VE-cadherin width in fibronectin 19.2 kPa VE-cadherin image: (C) A representative image showing how to select a perpendicular line across the VE-cadherin signal. (yellow line), (D) black line: the intensity profile across the yellow line in C, blue line: Gaussian fitting. Scale bar = 25  $\mu\text{m}$**

After fitting the VE-cadherin signal intensity to the Gaussian curve, we can measure the full width and half maximum (FWHM) using the following formulas. We considered FWHM as the width of the VE-cadherin.

Gaussian function:

$$f(x) = \frac{1}{\sigma\sqrt{2\pi}} \exp\left[-\frac{(x - x_0)^2}{2\sigma^2}\right]$$

Full width and half maximum:

$$\text{FWHM} \approx 2.355 \sigma$$

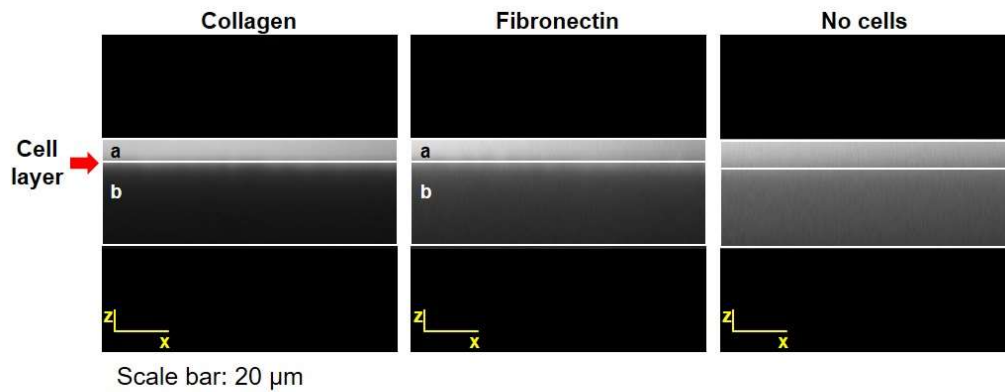

- a. Dextran layer (above cells or gel surface)
- b. Polyacrylamide gel layer (below cells or gel surface)

**Figure S4 Representative side view images of PA gel (19.2 kPa) with and without cellular monolayer immersed in FITC-dextran. These side view images are reconstructed using 3D project plugin (using the projection method “mean value”) in ImageJ software. Every z-section is 5  $\mu\text{m}$  apart and between z-sections the signals are interpolated.**
